# Supplementary material for: Longitudinal Trajectory Modeling to Assess Adherence to Sacubitril/Valsartan among Patients with Heart Failure
Source: MDPI journal article supplement (doi:10.3390/pharmaceutics15112568), 2023-11-01
Supplement: s1 [file s1]

## Supplementary Material

Figure S1. Study flow chart

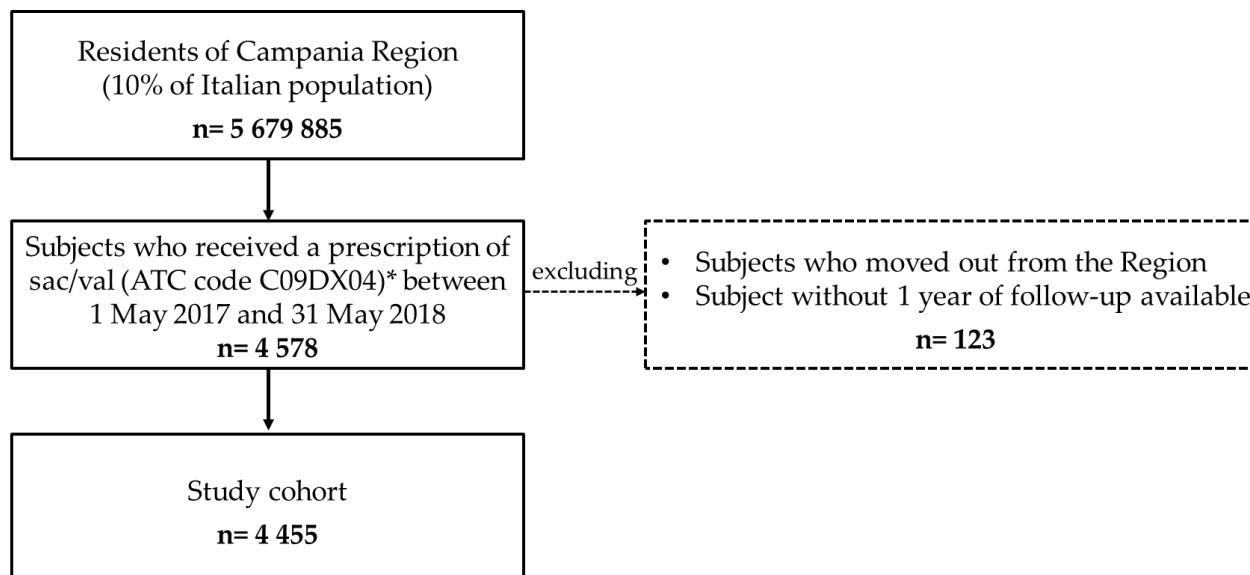

\*Notes: Sac/val received approval for the treatment of chronic heart failure (HF) with reduced ejection fraction (HFrEF), specifically in cases where the left ventricular ejection fraction (LVEF) is  $\leq 40\%$ . Therefore, the prescription of sac/val inherently implies the presence of HF. Furthermore, sac/val was introduced to the Italian market in May 2017. Given that our recruitment period commenced on January 1, 2017, all subjects within our study cohort initiated sac/val treatment, rendering the application of a wash-out period unnecessary for these reasons.

**Table S1. Baseline patient's characteristics stratified by Sac/Val index dosage (N = 4 455)**

| Characteristics                                | Low-dosage<br>(24mg/26mg) | Medium-dosage (49mg/51mg) | High-dosage (97mg/103mg) |
|------------------------------------------------|---------------------------|---------------------------|--------------------------|
| <b>Total °, N (%)</b>                          | <b>2 941 (66)</b>         | <b>1 306 (29.3)</b>       | <b>208 (4.7)</b>         |
| <b>Gender, N (%)</b>                           |                           |                           |                          |
| Female                                         | 876 (29.8)                | 407 (31.2)                | 50 (24)                  |
| Male                                           | 2 057 (69.9)              | 897 (68.7)                | 156 (75)                 |
| <b>Age, Mean (SD)</b>                          | <b>69.5±11.9</b>          | <b>68.8±12.0</b>          | <b>65.6±12.5</b>         |
| <b>Age groups, N (%)</b>                       |                           |                           |                          |
| 0-25 y                                         | 10 (0.3)                  | 6 (0.5)                   | 1 (0.5)                  |
| 26-50 y                                        | 192 (6.5)                 | 87 (6.7)                  | 26 (12.5)                |
| 51-75 y                                        | 1 733 (58.9)              | 788 (60.3)                | 131 (63)                 |
| over 76 y                                      | 998 (33.9)                | 423 (32.4)                | 48 (23.1)                |
| <b>Polypharmacy,* N (%)</b>                    |                           |                           |                          |
| No polypharmacy (1-4 drugs)                    | 895 (30.4)                | 399 (30.6)                | 69 (33.2)                |
| Polypharmacy (5-9 drugs)                       | 943 (32.1)                | 404 (30.9)                | 63 (30.3)                |
| Excessive polypharmacy (≥10 drugs)             | 1 081 (36.8)              | 498 (38.1)                | 75 (36.1)                |
| <b>ACCI score, Mean (SD)</b>                   | <b>8.1 (6.5)</b>          | <b>7.7 (5.8)</b>          | <b>6.9 (4.8)</b>         |
| <b>Hospital admission,* Mean (SD)</b>          | <b>1.7 (1.1)</b>          | <b>1.7 (1.2)</b>          | <b>1.6 (1.0)</b>         |
| Had ≥1 hospitalization for HF, N (%)           | 1 061 (36.1)              | 364 (27.9)                | 64 (30.8)                |
| Had ≥2 hospitalization for other causes, N (%) | 587 (20)                  | 252 (19.3)                | 36 (17.3)                |
| <b>Medication HF-related,* N (%)</b>           |                           |                           |                          |
| Beta blocking agents                           | 2 603 (88.5)              | 1 125 (86.1)              | 177 (85.1)               |
| Antithrombotic agents                          | 2 479 (84.3)              | 1 085 (83.1)              | 169 (81.3)               |
| Agents acting on the renin-angiotensin system  | 2 338 (79.5)              | 1 111 (85.1)              | 176 (84.6)               |
| Diuretics                                      | 2 381 (81)                | 1 005 (77)                | 145 (69.7)               |
| <b>Other medications,* N (%)</b>               |                           |                           |                          |
| Lipid modifying agents                         | 1 964 (66.8)              | 915 (70.1)                | 139 (66.8)               |
| Cardiac therapy                                | 1 560 (53)                | 706 (54.1)                | 98 (47.1)                |
| Drugs for obstructive airway diseases          | 1 275 (43.4)              | 538 (41.2)                | 79 (38)                  |
| Drugs used in diabetes                         | 1 023 (34.8)              | 490 (37.5)                | 70 (33.7)                |
| <b>Cardiovascular comorbidities,* N (%)</b>    |                           |                           |                          |
| Cardiomyopathy                                 | 293 (10)                  | 107 (8.2)                 | 22 (10.6)                |
| CCS                                            | 199 (6.8)                 | 118 (9)                   | 22 (10.6)                |
| Hypertension                                   | 148 (5)                   | 53 (4.1)                  | 20 (9.6)                 |
| CCS with STEMI                                 | 129 (4.4)                 | 46 (3.5)                  | 4 (1.9)                  |
| CCS with NSTEMI                                | 109 (3.7)                 | 50 (3.8)                  | 5 (2.4)                  |
| Atrial fibrillation                            | 107 (3.6)                 | 38 (2.9)                  | 4 (1.9)                  |
| <b>Other comorbidities,* N (%)</b>             |                           |                           |                          |
| Diabetes                                       | 349 (11.9)                | 141 (10.8)                | 16 (7.7)                 |
| Chronic kidney disease                         | 143 (4.9)                 | 56 (4.3)                  | 7 (3.4)                  |
| Respiratory failure                            | 97 (3.3)                  | 31 (2.4)                  | 4 (1.9)                  |

° Percentage calculated on the total of subjects analyzed \* Conditions occurring one year prior to the index date of initiation of Sac/Val therapy

Notes: Low-dose: sacubitril 24mg / valsartan 26mg; Medium-dose: sacubitril 49mg / valsartan 51mg; High-dose: sacubitril 97mg / valsartan 103mg

Abbreviations: CCS, Chronic coronary syndrome; ICH, Ischemia; HF, Heart failure; IQR, Interquartile range; NSTEMI, non-ST elevation myocardial infarction; SD, Standard deviation; STEMI, ST elevation myocardial infarction.

Figure S2. Calinski & Harabasz (CH) sorted criterion chosen for the selection of the four adherence groups

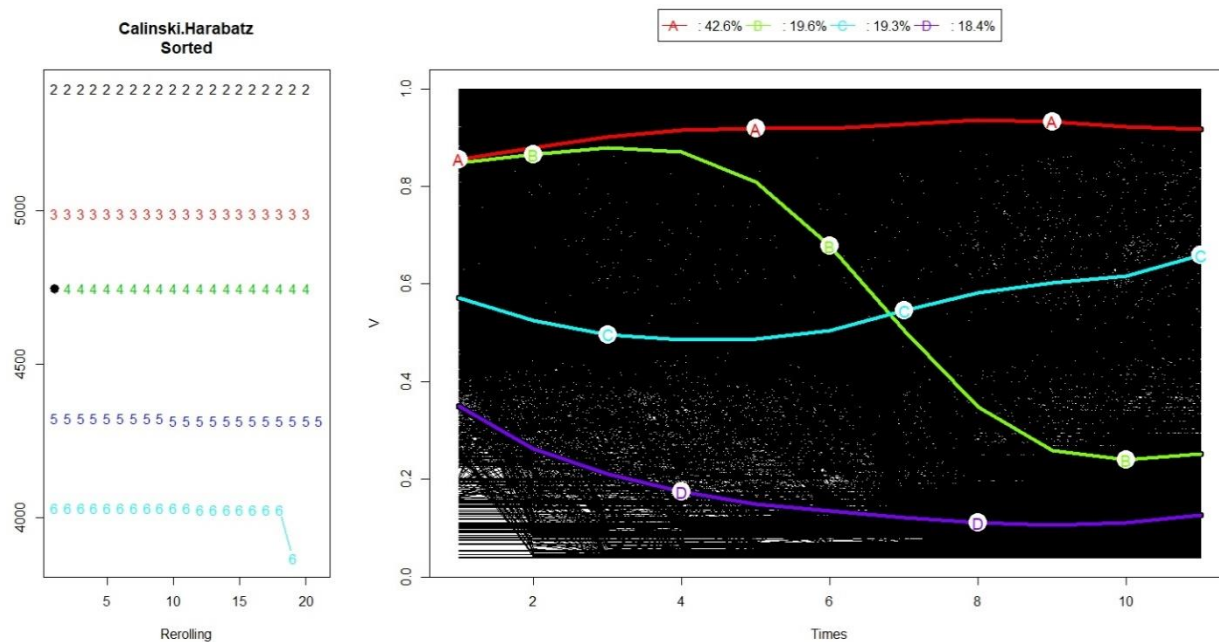

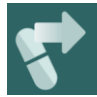

Table S2. Logistic regression models of predictors of adherence trajectories

|                                               | Group A<br>High Adherence |                | Group B<br>Partial drop-off |                | Group C<br>Moderate adherence |                | Group D<br>Low adherence |                |
|-----------------------------------------------|---------------------------|----------------|-----------------------------|----------------|-------------------------------|----------------|--------------------------|----------------|
| Logistic regression model                     | Adjusted<br>OR (95% CI)   | <i>p-value</i> | Adjusted<br>OR (95% CI)     | <i>p-value</i> | Adjusted<br>OR (95% CI)       | <i>p-value</i> | Adjusted<br>OR (95% CI)  | <i>p-value</i> |
| <b>Gender</b>                                 |                           |                |                             |                |                               |                |                          |                |
| Female (vs male)                              | 1.064 (1.053-1.074)       | <0.001         | 0.913 (0.902-0.925)         | <0.001         | 1.239 (1.222-1.255)           | <0.001         | 0.815 (0.805-0.825)      | <0.001         |
| <b>Polypharmacy</b>                           |                           |                |                             |                |                               |                |                          |                |
| Polypharmacy (vs no polypharmacy)             | 1.052 (1.039-1.066)       | <0.001         | 1.194 (1.175-1.214)         | <0.001         | 0.943 (0.928-0.959)           | <0.001         | 0.827 (0.813-0.84)       | <0.001         |
| Excessive polypharmacy (vs no polypharmacy)   | 1.041 (1.029-1.054)       | <0.001         | 1.184 (1.166-1.202)         | <0.001         | 0.913 (0.899-0.926)           | <0.001         | 0.877 (0.864-0.89)       | <0.001         |
| <b>Hospital admission</b>                     |                           |                |                             |                |                               |                |                          |                |
| Had ≥1 hospitalization for HF                 | 0.981 (0.971-0.99)        | <0.001         | 0.9 (0.888-0.911)           | <0.001         | 0.98 (0.968-0.993)            | 0.002          | 1.165 (1.151-1.179)      | <0.001         |
| Had ≥2 hospitalization for other causes       | 0.781 (0.771-0.791)       | <0.001         | 1.124 (1.107-1.141)         | <0.001         | 0.851 (0.838-0.865)           | <0.001         | 1.481 (1.459-1.503)      | <0.001         |
| <b>Medications HF-related</b>                 |                           |                |                             |                |                               |                |                          |                |
| Beta blocking agents                          | 1.003 (0.988-1.019)       | 0.675          | 1.021 (1.002-1.041)         | 0.035          | 0.988 (0.969-1.008)           | 0.231          | 0.986 (0.967-1.005)      | 0.142          |
| Antithrombotic agents                         | 0.995 (0.979-1.012)       | 0.577          | 1.009 (0.988-1.031)         | 0.403          | 1.013 (0.992-1.035)           | 0.226          | 0.986 (0.965-1.007)      | 0.182          |
| Agents acting on the renin-angiotensin system | 1.016 (0.999-1.032)       | 0.060          | 1.009 (0.989-1.03)          | 0.390          | 1.001 (0.981-1.021)           | 0.937          | 0.967 (0.947-0.986)      | 0.001          |
| Diuretics                                     | 1.041 (1.024-1.058)       | <0.001         | 0.991 (0.971-1.012)         | 0.400          | 0.967 (0.947-0.987)           | 0.002          | 0.979 (0.959-0.999)      | 0.036          |
| <b>Other medications</b>                      |                           |                |                             |                |                               |                |                          |                |
| Lipid modifying agents                        | 0.995 (0.977-1.013)       | 0.565          | 0.995 (0.973-1.017)         | 0.629          | 0.991 (0.969-1.014)           | 0.452          | 1.022 (1-1.044)          | 0.054          |
| Cardiac therapy                               | 0.969 (0.949-0.989)       | 0.003          | 0.971 (0.946-0.997)         | 0.032          | 1.146 (1.117-1.176)           | <0.001         | 0.939 (0.915-0.965)      | <0.001         |
| Drugs for obstructive airway diseases         | 0.945 (0.916-0.975)       | <0.001         | 1.212 (1.168-1.257)         | <0.001         | 0.922 (0.886-0.959)           | <0.001         | 0.966 (0.93-1.004)       | 0.080          |
| Drugs used in diabetes                        | 1.085 (1.062-1.109)       | <0.001         | 0.937 (0.911-0.964)         | <0.001         | 1.002 (0.974-1.03)            | 0.907          | 0.933 (0.908-0.96)       | <0.001         |
| <b>Cardiovascular comorbidities</b>           |                           |                |                             |                |                               |                |                          |                |
| Cardiomyopathy                                | 1.054 (1.04-1.068)        | <0.001         | 1.018 (1.001-1.036)         | 0.042          | 0.912 (0.896-0.928)           | <0.001         | 0.989 (0.972-1.006)      | 0.190          |
| CCS                                           | 0.469 (0.434-0.507)       | <0.001         | 0.962 (0.882-1.05)          | 0.388          | 2.514 (2.341-2.701)           | <0.001         | 0.983 (0.903-1.071)      | 0.702          |
| Hypertension                                  | 0.787 (0.765-0.81)        | <0.001         | 1.34 (1.297-1.384)          | <0.001         | 1.036 (1-1.073)               | 0.047          | 1.01 (0.976-1.045)       | 0.566          |
| CCS with STEMI                                | 0.893 (0.867-0.919)       | <0.001         | 1.11 (1.072-1.149)          | <0.001         | 0.89 (0.857-0.924)            | <0.001         | 1.18 (1.141-1.221)       | <0.001         |
| Atrial fibrillation                           | 1.109 (1.093-1.126)       | <0.001         | 1.012 (0.993-1.03)          | 0.220          | 0.99 (0.972-1.009)            | 0.302          | 0.849 (0.833-0.865)      | <0.001         |
| CCS with NSTEMI                               | 1.057 (1.026-1.09)        | <0.001         | 1.529 (1.478-1.582)         | <0.001         | 0.904 (0.869-0.94)            | <0.001         | 0.589 (0.564-0.616)      | <0.001         |
| <b>Other comorbidities</b>                    |                           |                |                             |                |                               |                |                          |                |
| Diabetes                                      | 0.98 (0.963-0.996)        | 0.017          | 0.853 (0.835-0.872)         | <0.001         | 1.212 (1.187-1.236)           | <0.001         | 0.992 (0.972-1.013)      | 0.448          |
| Chronic kidney disease                        | 0.802 (0.782-0.823)       | <0.001         | 0.867 (0.839-0.895)         | <0.001         | 1.595 (1.55-1.641)            | <0.001         | 0.965 (0.936-0.995)      | 0.023          |
| Respiratory failure                           | 0.989 (0.968-1.011)       | 0.311          | 0.966 (0.94-0.993)          | 0.014          | 0.97 (0.944-0.998)            | 0.034          | 1.079 (1.051-1.107)      | <0.001         |
